# Supplementary figures and images for: Antimicrobial, antioxidant and anticancer activity of biogenic silver nanoparticles – an experimental report
Source: Royal Society of Chemistry journal article supplement (doi:10.1039/c6ra17569d), 2016-01-01

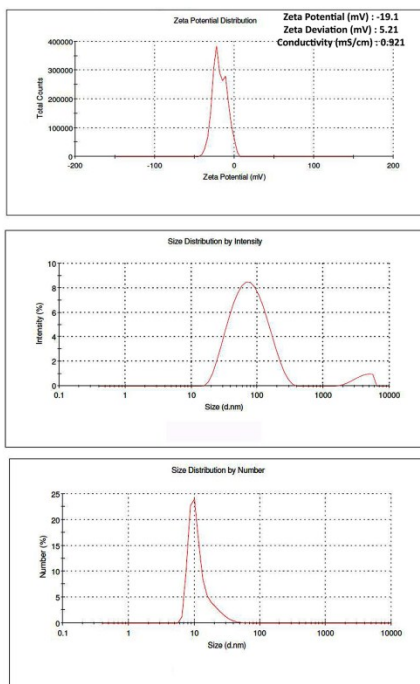

Fig. S1

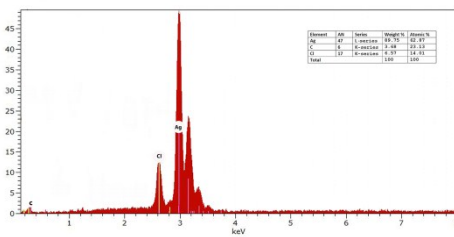

Fig. S2

Supplement: c6ra17569d1.pdf [file c6ra17569d1.pdf]
